# Supplementary material
Source: PubMed Central journal article supplement (PMC8278631)
Supplement: 12978_2021_1162_MOESM3_ESM.pdf [file 12978_2021_1162_MOESM3_ESM.pdf]

# E-MOTIVE Formative Survey

## Country Selection

Please select the country you are based in: \*

- Kenya
- Nigeria
- South Africa – Eastern Cape
- South Africa – Western Cape
- South Africa – KwaZulu-Natal
- Sri Lanka
- Tanzania

## Local Contact Details (Kenya)

The E-MOTIVE Principal Investigator in Kenya is [REDACTED]

The E-MOTIVE study co-ordinator in Kenya is [REDACTED]

If you have any problems and need help completing this survey please contact one of the above.

What is the name of the facility you currently work at? \*

## Local Contact Details (Nigeria)

The E-MOTIVE Principal Investigator in Nigeria is [REDACTED]

The E-MOTIVE Trial Coordinator in Nigeria is [REDACTED]

If you have any problems and need help completing this survey please contact one of the above.

What is the name of the facility you currently work at? \*

## Local Contact Details (South Africa - Eastern Cape)

The E-MOTIVE Principal Investigator in South Africa is [REDACTED]

The E-MOTIVE Trial Coordinator in South Africa (Eastern Cape) is [REDACTED]

If you have any problems and need help completing this survey please contact one of the above.

What is the name of the facility you currently work at?

## Local Contact Details (South Africa - Western Cape)

The E-MOTIVE Principal Investigator in South Africa is [REDACTED]

The E-MOTIVE Co-Principal Investigator in South Africa (Western Cape) is [REDACTED]

The E-MOTIVE Trial Coordinator in South Africa (Western Cape) is [REDACTED]

If you have any problems and need help completing this survey please contact one of the above.

**What is the name of the facility you currently work at?**

## Local Contact Details (South Africa - KwaZulu-Natal)

The E-MOTIVE Principal Investigator in South Africa is [REDACTED]

The E-MOTIVE Trial Coordinators in South Africa (KwaZulu-Natal) are [REDACTED]

and [REDACTED]

If you have any problems and need help completing this survey please contact one of the above.

**What is the name of the facility you currently work at? \***

## Local Contact Details (Sri Lanka)

The E-MOTIVE Principal Investigator in Sri Lanka is [REDACTED]

The E-MOTIVE Trial Coordinator in Sri Lanka is [REDACTED]

If you have any problems and need help completing this survey please contact one of the above.

**What is the name of the facility you currently work at? \***

## Local Contact Details (Tanzania)

The E-MOTIVE Principal Investigator in Tanzania is [REDACTED]

The E-MOTIVE Trial Coordinators in Tanzania are [REDACTED]

and [REDACTED]

If you have any problems and need help completing this survey please contact one of the above.

**What is the name of the facility you currently work at? \***

## Demographics

For the purpose of this survey we will be focusing on the **detection and management** of postpartum haemorrhage after vaginal births in your hospital. By detection we are referring to the

initial diagnosis of postpartum haemorrhage. This survey is not focused on the prevention of postpartum haemorrhage.

There are no right or wrong answers to any of the questions asked in this survey, we are simply interested in exploring your personal experience and beliefs surrounding postpartum haemorrhage. We want to reassure you that the answers you give will not be able to be linked back to you, and will remain anonymous and confidential.

We would like to start with a few questions about your role in your current job, and the facility where you work. Please work through the questions on this page before progressing on to the next section of questions.

**What is your current position? \***

- Consultant (or specialist doctor)
- Medical doctor
- Medical doctor in training - resident
- Medical doctor in training - house officer
- Medical student
- Clinical/medical officer (non-physician clinician)
- Nurse
- Nursing student
- Midwife
- Midwifery student
- Nurse-Midwife
- Nurse-Midwifery student
- Other (please specify):

**How long, in years, have you worked in this position at this hospital? \***

**How long, in years, have you worked in this position in total? Note: The answer you provide must be equal or greater than your answer to the previous question \***

**When did you last perform or assist with a vaginal delivery? \***

- In the last week
- In the last month
- In the last 3 months
- In the last 6 months
- Over 6 months ago

I have never performed or assisted with a vaginal delivery

**When was the last time you detected and/or managed a case of postpartum haemorrhage? \***

- In the last week
- In the last month
- In the last 3 months
- In the last 6 months
- Over 6 months ago
- I have never detected and/or managed a case of postpartum haemorrhage

## Training

Next, we would like to focus on the training you have received around detecting and managing postpartum haemorrhage.

**Have you received any training about postpartum haemorrhage detection and/or management? \* [Capability, Physical]**

- Yes - **detection** of postpartum haemorrhage training only
- Yes - **management** of postpartum haemorrhage training only
- Yes - postpartum haemorrhage **detection and management** training
- No postpartum haemorrhage training
- Unsure

**How long ago did you receive your most recent training? \* [Capability, Physical]**

- Less than one year ago
- 1-2 years ago
- 3-5 years ago
- Over 5 years ago

**Please think back to your most recent postpartum haemorrhage training.**

**Was your most recent postpartum haemorrhage training given by...? \* [Capability, Physical]**

- Trainers from your own hospital
- Trainers from the district or regional team
- Trainers from another organisation e.g. a Non-Governmental Organisation (NGO)
- Trainers from the Ministry of Health

- I don't know
- Other (please specify):

**What was the format of the training? Please tick all that apply. \* [Capability, Physical]**

- Workshop
- Presentation
- Simulation
- Case based
- Lectures
- Textbook
- Other (please specify):

## Training

**To what extent do you agree with the following statements...? \***

|                                                                                                                         | Strongly disagree        | Disagree                 | Neither agree nor disagree | Agree                    | Strongly agree           | I have not received training |
|-------------------------------------------------------------------------------------------------------------------------|--------------------------|--------------------------|----------------------------|--------------------------|--------------------------|------------------------------|
| I think that the postpartum haemorrhage training I received was useful [Capability, Physical]                           | <input type="checkbox"/> | <input type="checkbox"/> | <input type="checkbox"/>   | <input type="checkbox"/> | <input type="checkbox"/> | <input type="checkbox"/>     |
| I have been adequately trained how to <b>detect</b> postpartum haemorrhage after a vaginal birth [Capability, Physical] | <input type="checkbox"/> | <input type="checkbox"/> | <input type="checkbox"/>   | <input type="checkbox"/> | <input type="checkbox"/> | <input type="checkbox"/>     |
| I have been adequately trained how to <b>manage</b> postpartum haemorrhage after a vaginal birth [Capability, Physical] | <input type="checkbox"/> | <input type="checkbox"/> | <input type="checkbox"/>   | <input type="checkbox"/> | <input type="checkbox"/> | <input type="checkbox"/>     |

## Guidelines

We would now like to ask you a few questions about postpartum haemorrhage guidelines.

*To clarify, guidelines are any local, hospital-specific, national, or international recommendations, steps, procedures or protocols for detecting and managing postpartum haemorrhage.*

**Are there clinical practice guidelines used in your facility to detect and manage postpartum haemorrhage? \* [Capability, Psychological]**

- Yes
- No

**Are these clinical practice guidelines on display (e.g. posters, on a bulletin board)? \***  
[Opportunity, Physical]

- Yes
- No

**Where are the guidelines for postpartum haemorrhage detection and management displayed? Please tick all that apply. \*** [Opportunity, Physical]

- Labour and/or delivery rooms
- Tea room / break room
- Meeting room for clinical staff
- Other (please specify):

**To what extent do you agree or disagree with the following statements...? \***

|                                                                                                                                                     | Strongly disagree        | Disagree                 | Neither agree nor disagree | Agree                    | Strongly agree           |
|-----------------------------------------------------------------------------------------------------------------------------------------------------|--------------------------|--------------------------|----------------------------|--------------------------|--------------------------|
| I am aware of recommendations and guidelines for the management and detection of postpartum haemorrhage [Capability, Psychological]                 | <input type="checkbox"/> | <input type="checkbox"/> | <input type="checkbox"/>   | <input type="checkbox"/> | <input type="checkbox"/> |
| I use clinical guidelines when I am detecting and managing a postpartum haemorrhage [Capability, Psychological]                                     | <input type="checkbox"/> | <input type="checkbox"/> | <input type="checkbox"/>   | <input type="checkbox"/> | <input type="checkbox"/> |
| I find recommendations and guidelines for detecting and managing postpartum haemorrhage useful for my clinical practice [Capability, Psychological] | <input type="checkbox"/> | <input type="checkbox"/> | <input type="checkbox"/>   | <input type="checkbox"/> | <input type="checkbox"/> |
| I can easily access a copy of clinical guidelines for detecting and managing postpartum haemorrhage in my hospital [Opportunity, Physical]          | <input type="checkbox"/> | <input type="checkbox"/> | <input type="checkbox"/>   | <input type="checkbox"/> | <input type="checkbox"/> |

## Detecting Postpartum Haemorrhage

The next section of the survey is about how postpartum haemorrhage is **detected** after a vaginal birth at your hospital. *By detection we are referring to the initial diagnosis of postpartum haemorrhage.*

**Is detecting postpartum haemorrhage after a vaginal birth part of your clinical role? \***  
[Motivation, Reflective]

- Yes
- No



**To what extent do you agree or disagree with the following statements...? \***

|                                                                                                                                                                                | Strongly disagree        | Disagree                 | Neither agree nor disagree | Agree                    | Strongly agree           |
|--------------------------------------------------------------------------------------------------------------------------------------------------------------------------------|--------------------------|--------------------------|----------------------------|--------------------------|--------------------------|
| My team is disciplined for failing to detect a PPH during a vaginal birth <i>[Motivation, Automatic]</i>                                                                       | <input type="checkbox"/> | <input type="checkbox"/> | <input type="checkbox"/>   | <input type="checkbox"/> | <input type="checkbox"/> |
| My emotional state affects how I detect a PPH <i>[Motivation, Automatic]</i>                                                                                                   | <input type="checkbox"/> | <input type="checkbox"/> | <input type="checkbox"/>   | <input type="checkbox"/> | <input type="checkbox"/> |
| When I detect a PPH during a vaginal birth I receive feedback on my performance <i>[Capability, Psychological]</i>                                                             | <input type="checkbox"/> | <input type="checkbox"/> | <input type="checkbox"/>   | <input type="checkbox"/> | <input type="checkbox"/> |
| I know what I need to do to detect a postpartum haemorrhage after a vaginal birth <i>[Capability, Psychological]</i>                                                           | <input type="checkbox"/> | <input type="checkbox"/> | <input type="checkbox"/>   | <input type="checkbox"/> | <input type="checkbox"/> |
| I get sufficient feedback about my performance when I detect a PPH during a vaginal birth <i>[Capability, Psychological]</i>                                                   | <input type="checkbox"/> | <input type="checkbox"/> | <input type="checkbox"/>   | <input type="checkbox"/> | <input type="checkbox"/> |
| I want to improve how I detect PPH during a vaginal birth <i>[Motivation, Reflective]</i>                                                                                      | <input type="checkbox"/> | <input type="checkbox"/> | <input type="checkbox"/>   | <input type="checkbox"/> | <input type="checkbox"/> |
| Fear of repercussions from the patient and their family affect how I detect a PPH <i>[Motivation, Automatic]</i>                                                               | <input type="checkbox"/> | <input type="checkbox"/> | <input type="checkbox"/>   | <input type="checkbox"/> | <input type="checkbox"/> |
| If I need help detecting a postpartum haemorrhage after a vaginal birth, I can easily get the support or assistance I need from my team <i>[Opportunity, Social]</i>           | <input type="checkbox"/> | <input type="checkbox"/> | <input type="checkbox"/>   | <input type="checkbox"/> | <input type="checkbox"/> |
| I have the skills to detect postpartum haemorrhage after vaginal birth <i>[Capability, Physical]</i>                                                                           | <input type="checkbox"/> | <input type="checkbox"/> | <input type="checkbox"/>   | <input type="checkbox"/> | <input type="checkbox"/> |
| In the past, I have needed assistance when detecting a postpartum haemorrhage after a vaginal birth, as I did not have the competency required <i>[Motivation, Reflective]</i> | <input type="checkbox"/> | <input type="checkbox"/> | <input type="checkbox"/>   | <input type="checkbox"/> | <input type="checkbox"/> |
| My emotions are negatively affected by detecting a PPH <i>[Motivation, Automatic]</i>                                                                                          | <input type="checkbox"/> | <input type="checkbox"/> | <input type="checkbox"/>   | <input type="checkbox"/> | <input type="checkbox"/> |
| I intend to improve my knowledge of PPH detection during vaginal birth <i>[Motivation, Reflective]</i>                                                                         | <input type="checkbox"/> | <input type="checkbox"/> | <input type="checkbox"/>   | <input type="checkbox"/> | <input type="checkbox"/> |
| I am confident that I can detect a postpartum haemorrhage after a vaginal birth, even when there is little time <i>[Motivation, Reflective]</i>                                | <input type="checkbox"/> | <input type="checkbox"/> | <input type="checkbox"/>   | <input type="checkbox"/> | <input type="checkbox"/> |



Improving PPH detection is not discussed in regular meetings at my facility  
*[Capability, Psychological]*

If I successfully detect a PPH after a vaginal birth at my health facility I am commended  
*[Motivation, Automatic]*

I feel good if I successfully detect a PPH during a vaginal birth  
*[Motivation, Automatic]*

It is easy to accurately estimate the volume of blood lost after a vaginal birth  
*[Capability, Psychological]*

It is easy to distinguish between normal blood loss and a postpartum haemorrhage after a vaginal birth  
*[Capability, Psychological]*

## Managing Postpartum Haemorrhage

The next section of this survey is about how postpartum haemorrhage is **managed** after vaginal birth at your facility.

**Is managing postpartum haemorrhage after a vaginal birth part of your clinical role? \***  
*[Motivation, Reflective]*

Yes

No

You have detected a postpartum haemorrhage following a vaginal birth. We are now interested in your initial response.

*By initial response we mean all actions or interventions that you would always perform after a postpartum haemorrhage all at once or in quick succession before reassessing the woman.*

**What would be your initial response? Please tick all that apply. \*** *[Capability, Psychological]*

- Admission to ICU
- Administer ergometrine
- Repair of high vaginal or cervical tears
- Uterine massage
- Administer tranexamic acid (TXA)
- Blood pressure and pulse check
- Manual removal of placenta
- Administer carboprost

- Administer IV fluids
- Non-pneumatic anti-shock garment (NASG)
- Internal examination in delivery room
- Bimanual compression
- Uterine balloon tamponade
- Administer misoprostol
- Administer oxytocin
- Administer carbetocin
- Internal uterine exploration in theatre
- Other (please specify):

**How important do you think each of these actions or interventions are in helping to manage postpartum haemorrhage after a vaginal birth? \* [Motivation, Reflective]**

|                                          | Not at all important     | Slightly important       | Moderately important     | Very important           | Extremely important      |
|------------------------------------------|--------------------------|--------------------------|--------------------------|--------------------------|--------------------------|
| Admission to ICU                         | <input type="checkbox"/> | <input type="checkbox"/> | <input type="checkbox"/> | <input type="checkbox"/> | <input type="checkbox"/> |
| Administer ergometrine                   | <input type="checkbox"/> | <input type="checkbox"/> | <input type="checkbox"/> | <input type="checkbox"/> | <input type="checkbox"/> |
| Repair of high vaginal or cervical tears | <input type="checkbox"/> | <input type="checkbox"/> | <input type="checkbox"/> | <input type="checkbox"/> | <input type="checkbox"/> |
| Uterine massage                          | <input type="checkbox"/> | <input type="checkbox"/> | <input type="checkbox"/> | <input type="checkbox"/> | <input type="checkbox"/> |
| Administer tranexamic acid (TXA)         | <input type="checkbox"/> | <input type="checkbox"/> | <input type="checkbox"/> | <input type="checkbox"/> | <input type="checkbox"/> |
| Blood pressure and pulse check           | <input type="checkbox"/> | <input type="checkbox"/> | <input type="checkbox"/> | <input type="checkbox"/> | <input type="checkbox"/> |
| Manual removal of placenta               | <input type="checkbox"/> | <input type="checkbox"/> | <input type="checkbox"/> | <input type="checkbox"/> | <input type="checkbox"/> |
| Administer carboprost                    | <input type="checkbox"/> | <input type="checkbox"/> | <input type="checkbox"/> | <input type="checkbox"/> | <input type="checkbox"/> |
| Administer IV fluids                     | <input type="checkbox"/> | <input type="checkbox"/> | <input type="checkbox"/> | <input type="checkbox"/> | <input type="checkbox"/> |
| Non-pneumatic anti-shock garment (NASG)  | <input type="checkbox"/> | <input type="checkbox"/> | <input type="checkbox"/> | <input type="checkbox"/> | <input type="checkbox"/> |
| Internal examination in delivery room    | <input type="checkbox"/> | <input type="checkbox"/> | <input type="checkbox"/> | <input type="checkbox"/> | <input type="checkbox"/> |
| Bimanual compression                     | <input type="checkbox"/> | <input type="checkbox"/> | <input type="checkbox"/> | <input type="checkbox"/> | <input type="checkbox"/> |
| Uterine balloon tamponade                | <input type="checkbox"/> | <input type="checkbox"/> | <input type="checkbox"/> | <input type="checkbox"/> | <input type="checkbox"/> |
| Administer misoprostol                   | <input type="checkbox"/> | <input type="checkbox"/> | <input type="checkbox"/> | <input type="checkbox"/> | <input type="checkbox"/> |
| Administer oxytocin                      | <input type="checkbox"/> | <input type="checkbox"/> | <input type="checkbox"/> | <input type="checkbox"/> | <input type="checkbox"/> |
| Administer carbetocin                    | <input type="checkbox"/> | <input type="checkbox"/> | <input type="checkbox"/> | <input type="checkbox"/> | <input type="checkbox"/> |
| Internal uterine exploration in theatre  | <input type="checkbox"/> | <input type="checkbox"/> | <input type="checkbox"/> | <input type="checkbox"/> | <input type="checkbox"/> |

**How often do you and/or your team do the following when managing a postpartum haemorrhage following vaginal birth? \* [Capability, Psychological]**

|                                          | Never                    | Rarely                   | Sometimes                | Often                    | Always                   |
|------------------------------------------|--------------------------|--------------------------|--------------------------|--------------------------|--------------------------|
| Admission to ICU                         | <input type="checkbox"/> | <input type="checkbox"/> | <input type="checkbox"/> | <input type="checkbox"/> | <input type="checkbox"/> |
| Administer ergometrine                   | <input type="checkbox"/> | <input type="checkbox"/> | <input type="checkbox"/> | <input type="checkbox"/> | <input type="checkbox"/> |
| Repair of high vaginal or cervical tears | <input type="checkbox"/> | <input type="checkbox"/> | <input type="checkbox"/> | <input type="checkbox"/> | <input type="checkbox"/> |
| Uterine massage                          | <input type="checkbox"/> | <input type="checkbox"/> | <input type="checkbox"/> | <input type="checkbox"/> | <input type="checkbox"/> |
| Administer tranexamic acid (TXA)         | <input type="checkbox"/> | <input type="checkbox"/> | <input type="checkbox"/> | <input type="checkbox"/> | <input type="checkbox"/> |
| Blood pressure and pulse check           | <input type="checkbox"/> | <input type="checkbox"/> | <input type="checkbox"/> | <input type="checkbox"/> | <input type="checkbox"/> |
| Manual removal of placenta               | <input type="checkbox"/> | <input type="checkbox"/> | <input type="checkbox"/> | <input type="checkbox"/> | <input type="checkbox"/> |
| Administer carboprost                    | <input type="checkbox"/> | <input type="checkbox"/> | <input type="checkbox"/> | <input type="checkbox"/> | <input type="checkbox"/> |
| Administer IV fluids                     | <input type="checkbox"/> | <input type="checkbox"/> | <input type="checkbox"/> | <input type="checkbox"/> | <input type="checkbox"/> |
| Non-pneumatic anti-shock garment (NASG)  | <input type="checkbox"/> | <input type="checkbox"/> | <input type="checkbox"/> | <input type="checkbox"/> | <input type="checkbox"/> |
| Internal examination in delivery room    | <input type="checkbox"/> | <input type="checkbox"/> | <input type="checkbox"/> | <input type="checkbox"/> | <input type="checkbox"/> |
| Bimanual compression                     | <input type="checkbox"/> | <input type="checkbox"/> | <input type="checkbox"/> | <input type="checkbox"/> | <input type="checkbox"/> |
| Uterine balloon tamponade                | <input type="checkbox"/> | <input type="checkbox"/> | <input type="checkbox"/> | <input type="checkbox"/> | <input type="checkbox"/> |
| Administer misoprostol                   | <input type="checkbox"/> | <input type="checkbox"/> | <input type="checkbox"/> | <input type="checkbox"/> | <input type="checkbox"/> |
| Administer oxytocin                      | <input type="checkbox"/> | <input type="checkbox"/> | <input type="checkbox"/> | <input type="checkbox"/> | <input type="checkbox"/> |
| Administer carbetocin                    | <input type="checkbox"/> | <input type="checkbox"/> | <input type="checkbox"/> | <input type="checkbox"/> | <input type="checkbox"/> |
| Internal uterine exploration in theatre  | <input type="checkbox"/> | <input type="checkbox"/> | <input type="checkbox"/> | <input type="checkbox"/> | <input type="checkbox"/> |

**To what extent do you agree or disagree with the following statements...? \***

|                                                                                                                                                              | Strongly disagree        | Disagree                 | Neither agree nor disagree | Agree                    | Strongly agree           |
|--------------------------------------------------------------------------------------------------------------------------------------------------------------|--------------------------|--------------------------|----------------------------|--------------------------|--------------------------|
| If I need help managing a postpartum haemorrhage after a vaginal birth, I can easily get the support or assistance I need from my team [Opportunity, Social] | <input type="checkbox"/> | <input type="checkbox"/> | <input type="checkbox"/>   | <input type="checkbox"/> | <input type="checkbox"/> |
| Fear of repercussions from the patient and their family affect how I manage a PPH [Motivation, Automatic]                                                    | <input type="checkbox"/> | <input type="checkbox"/> | <input type="checkbox"/>   | <input type="checkbox"/> | <input type="checkbox"/> |

|                                                                                                                                                                                  | Strongly disagree        | Disagree                 | Neither agree nor disagree | Agree                    | Strongly agree           |
|----------------------------------------------------------------------------------------------------------------------------------------------------------------------------------|--------------------------|--------------------------|----------------------------|--------------------------|--------------------------|
| I get sufficient feedback about my performance when I manage a PPH<br><i>[Capability, Psychological]</i>                                                                         | <input type="checkbox"/> | <input type="checkbox"/> | <input type="checkbox"/>   | <input type="checkbox"/> | <input type="checkbox"/> |
| My team is disciplined for failing to manage a PPH during a vaginal birth<br><i>[Motivation, Automatic]</i>                                                                      | <input type="checkbox"/> | <input type="checkbox"/> | <input type="checkbox"/>   | <input type="checkbox"/> | <input type="checkbox"/> |
| My emotions are negatively affected by managing a PPH<br><i>[Motivation, Automatic]</i>                                                                                          | <input type="checkbox"/> | <input type="checkbox"/> | <input type="checkbox"/>   | <input type="checkbox"/> | <input type="checkbox"/> |
| I am confident that I can manage a postpartum haemorrhage after a vaginal birth, even when there is little time<br><i>[Motivation, Reflective]</i>                               | <input type="checkbox"/> | <input type="checkbox"/> | <input type="checkbox"/>   | <input type="checkbox"/> | <input type="checkbox"/> |
| I have the skills to manage a postpartum haemorrhage after a vaginal birth<br><i>[Capability, Physical]</i>                                                                      | <input type="checkbox"/> | <input type="checkbox"/> | <input type="checkbox"/>   | <input type="checkbox"/> | <input type="checkbox"/> |
| I want to improve how I manage PPH during a vaginal birth<br><i>[Motivation, Reflective]</i>                                                                                     | <input type="checkbox"/> | <input type="checkbox"/> | <input type="checkbox"/>   | <input type="checkbox"/> | <input type="checkbox"/> |
| If I successfully manage a PPH at my health facility I am commended<br><i>[Motivation, Automatic]</i>                                                                            | <input type="checkbox"/> | <input type="checkbox"/> | <input type="checkbox"/>   | <input type="checkbox"/> | <input type="checkbox"/> |
| I feel good if I successfully manage a PPH during a vaginal birth<br><i>[Motivation, Automatic]</i>                                                                              | <input type="checkbox"/> | <input type="checkbox"/> | <input type="checkbox"/>   | <input type="checkbox"/> | <input type="checkbox"/> |
| Improving PPH management is not discussed in regular meetings at my facility<br><i>[Capability, Psychological]</i>                                                               | <input type="checkbox"/> | <input type="checkbox"/> | <input type="checkbox"/>   | <input type="checkbox"/> | <input type="checkbox"/> |
| I intend to improve my knowledge of PPH management<br><i>[Motivation, Reflective]</i>                                                                                            | <input type="checkbox"/> | <input type="checkbox"/> | <input type="checkbox"/>   | <input type="checkbox"/> | <input type="checkbox"/> |
| My emotional state affects how I manage a PPH<br><i>[Motivation, Automatic]</i>                                                                                                  | <input type="checkbox"/> | <input type="checkbox"/> | <input type="checkbox"/>   | <input type="checkbox"/> | <input type="checkbox"/> |
| In the past, I have needed assistance when managing a postpartum haemorrhage after a vaginal birth, as I did not have the competency required<br><i>[Motivation, Reflective]</i> | <input type="checkbox"/> | <input type="checkbox"/> | <input type="checkbox"/>   | <input type="checkbox"/> | <input type="checkbox"/> |
| I know what I need to do to manage a postpartum haemorrhage after a vaginal birth<br><i>[Capability, Psychological]</i>                                                          | <input type="checkbox"/> | <input type="checkbox"/> | <input type="checkbox"/>   | <input type="checkbox"/> | <input type="checkbox"/> |
| When I manage a PPH I receive feedback on my performance<br><i>[Capability, Psychological]</i>                                                                                   | <input type="checkbox"/> | <input type="checkbox"/> | <input type="checkbox"/>   | <input type="checkbox"/> | <input type="checkbox"/> |

## Refractory Postpartum Haemorrhage

We are now interested in finding out what you would do if the initial response is unsuccessful in managing the postpartum haemorrhage, and the woman continues to bleed. We are calling this your 'next response'.

*To clarify, by next response we mean all actions or interventions that you would always perform as a second-line response if the woman continues to bleed despite the first response. If you ticked any of these options as your first response, please only tick here if you would do this again in your second response e.g. if you would administer a second dose of oxytocin.*

**What would be your next response? Please tick all that apply. \* [Motivation, Reflective]**

- Admission to ICU
- Administer ergometrine
- Repair of high vaginal or cervical tears
- Uterine massage
- Administer tranexamic acid (TXA)
- Blood pressure and pulse check
- Manual removal of placenta
- Administer carboprost
- Administer IV fluids
- Non-pneumatic anti-shock garment (NASG)
- Internal examination in delivery room
- Bimanual compression
- Uterine balloon tamponade
- Administer misoprostol
- Administer oxytocin
- Administer carbetocin
- Internal uterine exploration in theatre
- Other (please specify):

## Detecting and Managing Postpartum Haemorrhage

To what extent do you agree or disagree with the following statements \*

|                                                                                                                                           | Strongly disagree        | Disagree                 | Neither agree nor disagree | Agree                    | Strongly agree           | Unsure                   |
|-------------------------------------------------------------------------------------------------------------------------------------------|--------------------------|--------------------------|----------------------------|--------------------------|--------------------------|--------------------------|
| Postpartum haemorrhage is a problem for women giving birth vaginally in my hospital<br><i>[Motivation, Reflective]</i>                    | <input type="checkbox"/> | <input type="checkbox"/> | <input type="checkbox"/>   | <input type="checkbox"/> | <input type="checkbox"/> | <input type="checkbox"/> |
| Postpartum haemorrhage is something that concerns me<br><i>[Motivation, Automatic]</i>                                                    | <input type="checkbox"/> | <input type="checkbox"/> | <input type="checkbox"/>   | <input type="checkbox"/> | <input type="checkbox"/> | <input type="checkbox"/> |
| I find detecting and managing postpartum haemorrhage stressful<br><i>[Motivation, Automatic]</i>                                          | <input type="checkbox"/> | <input type="checkbox"/> | <input type="checkbox"/>   | <input type="checkbox"/> | <input type="checkbox"/> | <input type="checkbox"/> |
| Postpartum haemorrhage is a priority compared to my other clinical responsibilities in my current role<br><i>[Motivation, Reflective]</i> | <input type="checkbox"/> | <input type="checkbox"/> | <input type="checkbox"/>   | <input type="checkbox"/> | <input type="checkbox"/> | <input type="checkbox"/> |

## Availability

The next section will ask how readily available different tools and treatments are in your hospital.

## Measuring Tool

At your hospital, how readily available are...? \* *[Opportunity, Physical]*

|                                           | Never available          | Rarely available         | Sometimes available      | Often available          | Always available         |
|-------------------------------------------|--------------------------|--------------------------|--------------------------|--------------------------|--------------------------|
| Tools to measure the volume of blood lost | <input type="checkbox"/> | <input type="checkbox"/> | <input type="checkbox"/> | <input type="checkbox"/> | <input type="checkbox"/> |

Why are tools to measure the volume of blood lost not readily available? Please tick all that apply. \* *[Opportunity, Physical, and Capability, Physical]*

- Not routinely stocked
- Inconsistent supplies
- Incorrect supplies
- Not easily located when needed
- Storage issues - lack of space
- Inadequate staffing
- Other (please specify):

# Uterotonic Drugs

At your hospital, how readily available are...? *\*[Opportunity, Physical]*

|                                | Never available          | Rarely available         | Sometimes available      | Often available          | Always available         |
|--------------------------------|--------------------------|--------------------------|--------------------------|--------------------------|--------------------------|
| Uterotonic drugs e.g. oxytocin | <input type="checkbox"/> | <input type="checkbox"/> | <input type="checkbox"/> | <input type="checkbox"/> | <input type="checkbox"/> |

Why are uterotonic drugs not readily available? Please tick all that apply. *\*[Opportunity, Physical, and Capability, Physical]*

- Not routinely stocked
- Inconsistent supplies
- Incorrect supplies
- Not easily located when needed
- Storage issues - no refrigeration
- Storage issues - lack of space
- No trained staff to administer tranexamic acid
- Other (please specify):

# Tranexamic Acid (TXA)

At your hospital, how readily available is...? *\* [Opportunity, Physical]*

|                       | Never available          | Rarely available         | Sometimes available      | Often available          | Always available         |
|-----------------------|--------------------------|--------------------------|--------------------------|--------------------------|--------------------------|
| Tranexamic acid (TXA) | <input type="checkbox"/> | <input type="checkbox"/> | <input type="checkbox"/> | <input type="checkbox"/> | <input type="checkbox"/> |

Why is tranexamic acid (TXA) not readily available? Please tick all that apply. *\* [Opportunity, Physical, and Capability, Physical]*

- Not routinely stocked
- Inconsistent supplies
- Incorrect supplies
- Not easily located when needed
- Storage issues - lack of space
- No trained staff to administer tranexamic acid
- Other (please specify):

## IV Fluids

At your hospital, how readily available are...? \* [Opportunity, Physical]

|           | Never available          | Rarely available         | Sometimes available      | Often available          | Always available         |
|-----------|--------------------------|--------------------------|--------------------------|--------------------------|--------------------------|
| IV fluids | <input type="checkbox"/> | <input type="checkbox"/> | <input type="checkbox"/> | <input type="checkbox"/> | <input type="checkbox"/> |

Why are IV fluids not readily available? Please tick all that apply. \* [Opportunity, Physical, and Capability, Physical]

- Not routinely stocked
- Inconsistent supplies
- Incorrect supplies
- Not easily located when needed
- Storage issues - lack of space
- No trained staff to administer IV fluids
- Other (please specify):

## Blood Transfusion

At your hospital, how readily available are...? \* [Opportunity, Physical]

|                    | Never available          | Rarely available         | Sometimes available      | Often available          | Always available         |
|--------------------|--------------------------|--------------------------|--------------------------|--------------------------|--------------------------|
| Blood transfusions | <input type="checkbox"/> | <input type="checkbox"/> | <input type="checkbox"/> | <input type="checkbox"/> | <input type="checkbox"/> |

Why are blood transfusions not readily available? Please tick all that apply. \* [Opportunity, Physical, and Capability, Physical]

- Not routinely stocked
- Inconsistent supplies
- Incorrect supplies
- Time constraints with preparing blood
- Storage issues - lack of space
- No trained staff to administer blood transfusion
- Other (please specify):



## Non-Pneumatic Anti-Shock Garments (NASG)

At your hospital, how readily available are...? \* [Opportunity, Physical]

|                                          | Never available          | Rarely available         | Sometimes available      | Often available          | Always available         |
|------------------------------------------|--------------------------|--------------------------|--------------------------|--------------------------|--------------------------|
| Non-pneumatic anti-shock garments (NASG) | <input type="checkbox"/> | <input type="checkbox"/> | <input type="checkbox"/> | <input type="checkbox"/> | <input type="checkbox"/> |

Why are non-pneumatic anti-shock garments (NASG) not readily available? Please tick all that apply. \*[Opportunity, Physical, and Capability, Physical]

- Not routinely stocked
- Inconsistent supplies
- Incorrect supplies
- Not easily located when needed
- Storage issues - lack of space
- No trained staff to apply NASG
- Other (please specify):

## Uterine Balloon Tamponades (UBT)

At your hospital, how readily available are...? \* [Opportunity, Physical]

|                                  | Never available          | Rarely available         | Sometimes available      | Often available          | Always available         |
|----------------------------------|--------------------------|--------------------------|--------------------------|--------------------------|--------------------------|
| Uterine balloon tamponades (UBT) | <input type="checkbox"/> | <input type="checkbox"/> | <input type="checkbox"/> | <input type="checkbox"/> | <input type="checkbox"/> |

Why are uterine balloon tamponades (UBT) not readily available? Please tick all that apply. \*[Opportunity, Physical, and Capability, Physical]

- Not routinely stocked
- Inconsistent supplies
- Incorrect supplies
- Not easily located when needed
- Storage issues - lack of space
- No trained staff to insert the uterine balloon tamponade
- Other (please specify):





**What might make it easier to perform multiple interventions together at your hospital?  
Please tick all that apply. \***

- Improving team working *[Opportunity, Social]*
- Having reminders *[Opportunity, Social]*
- Increasing availability of supplies *[Opportunity, Physical]*
- Having all the required supplies in one place e.g. a box or a trolley *[Opportunity, Physical]*
- More training *[Capability, Physical]*
- Having opportunities to practice *[Capability, Physical]*
- Having plans, protocols or guidelines in place *[Capability, Psychological]*
- Other (please specify):

## **Improving the Detection and Management of Postpartum Haemorrhage**

Finally, we would like to ask some questions about improving postpartum haemorrhage detection and management after vaginal births in your hospital specifically.

**To what extent do you agree with the following statements...? \***

|                                                                                                                       | Strongly disagree        | Disagree                 | Neither agree nor disagree | Agree                    | Strongly agree           |
|-----------------------------------------------------------------------------------------------------------------------|--------------------------|--------------------------|----------------------------|--------------------------|--------------------------|
| Postpartum haemorrhage detection after vaginal birth needs to improve at my hospital <i>[Motivation, Reflective]</i>  | <input type="checkbox"/> | <input type="checkbox"/> | <input type="checkbox"/>   | <input type="checkbox"/> | <input type="checkbox"/> |
| Postpartum haemorrhage management after vaginal birth needs to improve at my hospital <i>[Motivation, Reflective]</i> | <input type="checkbox"/> | <input type="checkbox"/> | <input type="checkbox"/>   | <input type="checkbox"/> | <input type="checkbox"/> |

**Are any of the following strategies currently in place at your hospital to improve postpartum haemorrhage detection and management? Please tick all that you know are in place. \***

- Training and education *[Capability, Physical, and Capability, Psychological]*
- Decision aids *[Capability, Psychological]*
- Visual reminders/ posters *[Capability, Psychological]*
- Feedback on current practice *[Capability, Psychological]*
- Guidelines and protocols on display *[Opportunity, Physical]*
- Peer support *[Opportunity, Social]*
- Local postpartum haemorrhage (PPH) champions and leads *[Opportunity, Social]*
- Improving ease of access to supplies *[Opportunity, Physical]*

None of these strategies are in place

Other (please specify):

**How effective do you think each of the following strategies might be in improving postpartum haemorrhage detection and management at your hospital? \***

|                                                        | Not at all effective     | Slightly effective       | Moderately effective     | Very effective           | Extremely effective      | No opinion               |
|--------------------------------------------------------|--------------------------|--------------------------|--------------------------|--------------------------|--------------------------|--------------------------|
| Training and education                                 | <input type="checkbox"/> | <input type="checkbox"/> | <input type="checkbox"/> | <input type="checkbox"/> | <input type="checkbox"/> | <input type="checkbox"/> |
| Decision aids                                          | <input type="checkbox"/> | <input type="checkbox"/> | <input type="checkbox"/> | <input type="checkbox"/> | <input type="checkbox"/> | <input type="checkbox"/> |
| Reminders e.g. posters                                 | <input type="checkbox"/> | <input type="checkbox"/> | <input type="checkbox"/> | <input type="checkbox"/> | <input type="checkbox"/> | <input type="checkbox"/> |
| Feedback on current practice                           | <input type="checkbox"/> | <input type="checkbox"/> | <input type="checkbox"/> | <input type="checkbox"/> | <input type="checkbox"/> | <input type="checkbox"/> |
| Guidelines and protocols on display                    | <input type="checkbox"/> | <input type="checkbox"/> | <input type="checkbox"/> | <input type="checkbox"/> | <input type="checkbox"/> | <input type="checkbox"/> |
| Peer support                                           | <input type="checkbox"/> | <input type="checkbox"/> | <input type="checkbox"/> | <input type="checkbox"/> | <input type="checkbox"/> | <input type="checkbox"/> |
| Local postpartum haemorrhage (PPH) champions and leads | <input type="checkbox"/> | <input type="checkbox"/> | <input type="checkbox"/> | <input type="checkbox"/> | <input type="checkbox"/> | <input type="checkbox"/> |
| Improving ease of access to supplies                   | <input type="checkbox"/> | <input type="checkbox"/> | <input type="checkbox"/> | <input type="checkbox"/> | <input type="checkbox"/> | <input type="checkbox"/> |

## COVID-19

The final section of this survey will focus on the COVID-19 (coronavirus) pandemic.

**Do you think that the COVID-19 pandemic has affected how you detect and manage postpartum haemorrhage? \***

- Yes - how I **detect** postpartum haemorrhage has changed
- Yes - how I **manage** postpartum haemorrhage has changed
- Yes - how I **detect and manage** postpartum haemorrhage has changed
- No - how I detect and manage postpartum haemorrhage has not changed

**How has your practice surrounding the detection and management of postpartum haemorrhage changed? As a result of COVID-19... \***

|                                                                                   | Strongly disagree        | Disagree                 | Neither agree nor disagree | Agree                    | Strongly agree           |
|-----------------------------------------------------------------------------------|--------------------------|--------------------------|----------------------------|--------------------------|--------------------------|
| Non-COVID maternal care has been deprioritised<br><i>[Motivation, Reflective]</i> | <input type="checkbox"/> | <input type="checkbox"/> | <input type="checkbox"/>   | <input type="checkbox"/> | <input type="checkbox"/> |
| There is less access to routine tests for PPH<br><i>[Opportunity, Physical]</i>   | <input type="checkbox"/> | <input type="checkbox"/> | <input type="checkbox"/>   | <input type="checkbox"/> | <input type="checkbox"/> |

|                                                                                                      | Strongly disagree        | Disagree                 | Neither agree nor disagree | Agree                    | Strongly agree           |
|------------------------------------------------------------------------------------------------------|--------------------------|--------------------------|----------------------------|--------------------------|--------------------------|
| It is more difficult to access medications to manage PPH <i>[Opportunity, Physical]</i>              | <input type="checkbox"/> | <input type="checkbox"/> | <input type="checkbox"/>   | <input type="checkbox"/> | <input type="checkbox"/> |
| There are less staff available to monitor women pre-birth <i>[Opportunity, Social]</i>               | <input type="checkbox"/> | <input type="checkbox"/> | <input type="checkbox"/>   | <input type="checkbox"/> | <input type="checkbox"/> |
| There are less staff available to monitor women post-birth <i>[Opportunity, Social]</i>              | <input type="checkbox"/> | <input type="checkbox"/> | <input type="checkbox"/>   | <input type="checkbox"/> | <input type="checkbox"/> |
| Patients are coming to hospital less <i>[Opportunity, Social]</i>                                    | <input type="checkbox"/> | <input type="checkbox"/> | <input type="checkbox"/>   | <input type="checkbox"/> | <input type="checkbox"/> |
| We have more equipment and supplies to detect and manage PPH <i>[Opportunity, Physical]</i>          | <input type="checkbox"/> | <input type="checkbox"/> | <input type="checkbox"/>   | <input type="checkbox"/> | <input type="checkbox"/> |
| I have less time to detect and manage PPH <i>[Opportunity, Physical]</i>                             | <input type="checkbox"/> | <input type="checkbox"/> | <input type="checkbox"/>   | <input type="checkbox"/> | <input type="checkbox"/> |
| There are new policies and guidelines to follow <i>[Capability, Psychological]</i>                   | <input type="checkbox"/> | <input type="checkbox"/> | <input type="checkbox"/>   | <input type="checkbox"/> | <input type="checkbox"/> |
| The maternity ward has been converted to a COVID-19 ward <i>[Opportunity, Physical]</i>              | <input type="checkbox"/> | <input type="checkbox"/> | <input type="checkbox"/>   | <input type="checkbox"/> | <input type="checkbox"/> |
| More women are choosing to have home births than come into the hospital <i>[Opportunity, Social]</i> | <input type="checkbox"/> | <input type="checkbox"/> | <input type="checkbox"/>   | <input type="checkbox"/> | <input type="checkbox"/> |

**Thank You**

Thank you very much for the time you have taken to complete this survey.

**If there is anything further you would like to share about anything covered in this survey, please feel free to do so in the box below:**
